# Supplementary material
Source: ML conference proceedings conference paper supplement (https://openreview.net/forum?id=0kz5RmHxmE)
Supplement: supplementary_material [file attachment]

## 459 A Proof of Theorem 2

460 We use  $i$  to indicate the index of  $\lambda^{-1} = \max_{i \in N} |\lambda_{i+1} - \lambda_i|^{-1}$  and perturb graph Laplacian  $\mathbf{L}$  by  
 461 perturbing the eigenvectors. Specifically, we set

$$\begin{aligned} \mathbf{u}'_i &= \sqrt{1 - \epsilon^2} \mathbf{u}_i + \epsilon \mathbf{u}_{i+1}, \\ \mathbf{u}'_{i+1} &= -\epsilon \mathbf{u}_i + \sqrt{1 - \epsilon^2} \mathbf{u}_{i+1}. \end{aligned} \quad (1)$$

462 Note that  $\|\mathbf{u}'_i\| = \|\mathbf{u}'_{i+1}\| = 1$  and  $\mathbf{u}'_i{}^\top \mathbf{u}'_{i+1} = 0$ . Therefore, replacing  $\mathbf{u}_i$  and  $\mathbf{u}_{i+1}$  with  $\mathbf{u}'_i$  and  
 463  $\mathbf{u}'_{i+1}$  still satisfies EVD. We denote  $\mathbf{V}' = [\mathbf{u}_1, \dots, \mathbf{u}'_i, \mathbf{u}'_{i+1}, \dots, \mathbf{u}_k]$ . Then the perturbation can be  
 464 represented as  $\Delta \mathbf{L} = \mathbf{V}' \Lambda \mathbf{V}'^\top - \mathbf{V} \Lambda \mathbf{V}^\top = \lambda_i (\mathbf{u}'_i \mathbf{u}'_i{}^\top - \mathbf{u}_i \mathbf{u}_i{}^\top) + \lambda_{i+1} (\mathbf{u}'_{i+1} \mathbf{u}'_{i+1}{}^\top - \mathbf{u}_{i+1} \mathbf{u}_{i+1}{}^\top)$ .

465 For sufficient small  $\epsilon > 0$ , we have:

$$\begin{aligned} & \min_{\mathbf{Q} \in \mathbf{O}(k)} \|(\mathbf{V} + \Delta \mathbf{V}) - \mathbf{V} \mathbf{Q}\|_F \\ &= \|\mathbf{u}'_i - \mathbf{u}_i, \mathbf{u}'_{i+1} - \mathbf{u}_{i+1}\|_F \\ &= \|(\sqrt{1 - \epsilon^2} - 1) \mathbf{u}_i + \epsilon \mathbf{u}_{i+1}\|_F + \|(\sqrt{1 - \epsilon^2} - 1) \mathbf{u}_{i+1} - \epsilon \mathbf{u}_i\|_F \\ &= 4(1 - \sqrt{1 - \epsilon^2}) \\ &= 2\epsilon^2 + o(\epsilon^2). \end{aligned} \quad (2)$$

466 For Fourier features with period  $\frac{T}{2}$ , we have:

$$\begin{aligned} & \forall \mathbf{Q} \in \mathbf{O}(k) \|(\mathbf{V} + \Delta \mathbf{V}) \rho(\boldsymbol{\lambda}_k) - \mathbf{V} \rho(\boldsymbol{\lambda}_k)\|_F \\ &= \|\left[\mathbf{u}'_i - \mathbf{u}_i, \mathbf{u}'_{i+1} - \mathbf{u}_{i+1}\right] [\rho(\lambda_i), \rho(\lambda_{i+1})]^\top\|_F \\ &= \sum_{t=1}^{T/2} \|\sin(\lambda_i)(\mathbf{u}'_i - \mathbf{u}_i) + \sin(\lambda_{i+1})(\mathbf{u}'_{i+1} - \mathbf{u}_{i+1})\|_F \\ & \quad + \sum_{t=1}^{T/2} \|\cos(\lambda_i)(\mathbf{u}'_i - \mathbf{u}_i) + \cos(\lambda_{i+1})(\mathbf{u}'_{i+1} - \mathbf{u}_{i+1})\|_F \\ &\leq T (\|\mathbf{u}'_i - \mathbf{u}_i\|_F + \|\mathbf{u}'_{i+1} - \mathbf{u}_{i+1}\|_F) \\ &\leq T(2\epsilon^2 + o(\epsilon^2)), \end{aligned} \quad (3)$$

467 Next, we characterize  $\|\Delta \mathbf{L}\|_F$ :

$$\begin{aligned} & \|\Delta \mathbf{L}\|_F \\ &= \left\| \lambda_i (\mathbf{u}'_i \mathbf{u}'_i{}^\top - \mathbf{u}_i \mathbf{u}_i{}^\top) + \lambda_{i+1} (\mathbf{u}'_{i+1} \mathbf{u}'_{i+1}{}^\top - \mathbf{u}_{i+1} \mathbf{u}_{i+1}{}^\top) \right\|_F \\ &= \left\| (\lambda_{i+1} - \lambda_i) \left[ -\epsilon^2 (\mathbf{u}_i \mathbf{u}_i{}^\top - \mathbf{u}_{i+1} \mathbf{u}_{i+1}{}^\top) + \epsilon \sqrt{1 - \epsilon^2} (\mathbf{u}_i \mathbf{u}'_{i+1}{}^\top + \mathbf{u}_{i+1} \mathbf{u}'_i{}^\top) \right] \right\|_F^2 \\ &= (\lambda_{k+1} - \lambda_k)^2 \left( \epsilon^2 \|\mathbf{u}_k \mathbf{u}_{k+1}{}^\top + \mathbf{u}_{k+1} \mathbf{u}_k{}^\top\|_F^2 + o(\epsilon^2) \right) \\ &= 2(\lambda_{k+1} - \lambda_k)^2 (\epsilon^2 + o(\epsilon^2)) \end{aligned} \quad (4)$$

468 Combining Equations (2) and (4), we have the lower bound of the changes of non-equivariant spectral  
 469 features under small perturbations:

$$\min_{\mathbf{Q} \in \mathbf{O}(k)} \|(\mathbf{V} + \Delta \mathbf{V}) - \mathbf{V} \mathbf{Q}\|_F \geq 0.99 \max_{1 \leq i \leq k} |\lambda_{i+1} - \lambda_i|^{-1} \|\Delta \mathbf{L}\|_F + o(\epsilon), \quad (5)$$

470 which concludes the Lemma 1, *i.e.*, Lemma 3.4 in [37].

471 Combining Equations (3) and (4), we have the upper bound of the changes of equivariant spectral  
 472 features under small perturbations:

$$\forall \mathbf{Q} \in \mathbf{O}(k) \|(\mathbf{V} + \Delta \mathbf{V}) \rho(\boldsymbol{\lambda}_k) - \mathbf{V} \rho(\boldsymbol{\lambda}_k)\|_F \leq 0.99T \max_{1 \leq i \leq k} |\lambda_{i+1} - \lambda_i|^{-1} \|\Delta \mathbf{L}\|_F + o(\epsilon), \quad (6)$$

473 which concludes the Theorem 2.

## B Detailed Experimental Setup

In this section, we report the details of our experiments. Specifically, we first introduce some general settings in all experiments. Then we introduce the detailed setup of each experiment one by one.

### B.1 General Settings

**Optimizer.** For all experiments, we use the Adam optimizer.

**Environment.** The environment in which we run experiments is:

- Linux version: 5.19.0-38-generic
- Operating system: Ubuntu 22.04.2
- CPU information: AMD EPYC 7313P 16-Core Processor
- GPU information: GeForce RTX 3090 (24 GB)

**Resources.** The addresses and licenses of all datasets are as follows:

- PubMed: <https://github.com/tkipf/pygcn> (MIT License)
- Wiki-CS: <https://github.com/pmernyei/wiki-cs-dataset> (MIT License)
- Facebook: <https://github.com/benedekrozemberczki/MUSAE> (GPL-3.0 license)
- arXiv: <https://github.com/snap-stanford/ogb> (MIT license)
- Flickr: <https://github.com/GraphSAINT/GraphSAINT> (MIT license)
- PPI: <https://github.com/mims-harvard/ohmnet> (MIT license)
- OGB-graph: <https://github.com/snap-stanford/ogb> (MIT license)
- ZINC-2M: <https://github.com/snap-stanford/pretrain-gnns> (MIT license)

**Reproducibility.** Our code is attached in the supplementary material.

### B.2 Unsupervised Node Classification

**Evaluation protocol.** In the unsupervised node classification task, all methods are first trained with the corresponding self-supervised learning objectives. Then the learned representations are evaluated with a Logistic classifier with  $l_2$  normalization. We evaluate the method every 10 epochs and the maximum epoch is set to 1000. For the mini-batch training, we set the batch size to 1024. The detailed statistics are shown in Table 1 and the hyperparameters are shown in Table 2.

Table 1: Statistics of unsupervised node classification datasets.

|          | Graphs | Nodes   | Edges     | Features | Classes |
|----------|--------|---------|-----------|----------|---------|
| PubMed   | 1      | 19,717  | 88,648    | 500      | 3       |
| Wiki-CS  | 1      | 11,701  | 216,123   | 300      | 10      |
| Facebook | 1      | 22,470  | 342,004   | 128      | 4       |
| arXiv    | 1      | 169,343 | 1,116,243 | 128      | 40      |
| Flickr   | 1      | 89,250  | 899,756   | 500      | 7       |
| PPI      | 24     | 56,928  | 1,226,368 | 50       | 121     |

### B.3 Unsupervised Graph Prediction

**Evaluation protocol.** In the unsupervised graph prediction task, we use the stand encoder, provided by OGB<sup>2</sup>, as the spatial encoder of Sp<sup>2</sup>GCL, which is a 5-layer GIN with hidden dimension  $d = 300$ . We use add pooling to learn graph-level representations and set the batch size to 32. For the spectral

<sup>2</sup>[https://github.com/snap-stanford/ogb/blob/master/ogb/graphproppred/mol\\_encoder.py](https://github.com/snap-stanford/ogb/blob/master/ogb/graphproppred/mol_encoder.py)

Table 2: Statistics of unsupervised node classification datasets.

|          | # Eigenvectors ( $k$ ) | Period ( $T$ ) | lr   | wd | Dropout |
|----------|------------------------|----------------|------|----|---------|
| PubMed   | 30                     | 20             | 1e-3 | 0  | 0       |
| Wiki-CS  | 100                    | 20             | 1e-3 | 0  | 0       |
| Facebook | 100                    | 20             | 1e-3 | 0  | 0       |
| arXiv    | 200                    | 20             | 1e-3 | 0  | 0       |
| Flickr   | 100                    | 20             | 1e-3 | 0  | 0       |
| PPI      | 50                     | 20             | 1e-3 | 0  | 0       |

encoder, due to the relatively small sizes of the molecular graphs, we use all eigenvectors as the spectral features. We set the learning rate to 0.001 and the period to 10 for all datasets, and the number of training epochs is chosen among {20, 50, 80, 100, 150} using the validation set, as suggested by AD-GCL [27]. For the downstream evaluator, we use a Riger regressor for the regression tasks and a Logistic classifier for the binary classification tasks. The strength of  $l_2$  normalization is grid searched among {0.001, 0.01, 0.1, 1, 10, 100, 1000} on the validation set for each dataset. The detailed statistics of the datasets are shown in Table 3.

Table 3: Statistics of unsupervised graph prediction datasets.

|                  | Graphs | Avg. Nodes | Avg. Edges | Classes | Task          | Metric  |
|------------------|--------|------------|------------|---------|---------------|---------|
| ogbg-molesol     | 1,128  | 13.3       | 13.7       | 1       | Regression    | RMSE    |
| ogbg-mollipo     | 4,200  | 27.0       | 29.5       | 1       | Regression    | RMSE    |
| ogbg-molfreesolv | 642    | 8.7        | 8.4        | 1       | Regression    | RMSE    |
| ogbg-molbase     | 1,513  | 34.1       | 36.9       | 1       | Binary Class. | ROC-AUC |
| ogbg-molbbbp     | 2,039  | 24.1       | 26.0       | 1       | Binary Class. | ROC-AUC |
| ogbg-molclintox  | 1,477  | 26.2       | 27.9       | 2       | Binary Class. | ROC-AUC |
| ogbg-moltox21    | 7,831  | 18.6       | 19.3       | 12      | Binary Class. | ROC-AUC |
| ogbg-molsider    | 1,427  | 33.6       | 35.4       | 27      | Binary Class. | ROC-AUC |

## B.4 Transfer Learning

**Evaluation protocol.** For the transfer learning task, we use the same GIN encoder as [10]. In the pre-training stage, the learning rate is set to 0.001 and the number of training epochs is chosen from {20, 50, 80, 100} based on the validation set. Similarly, we use all eigenvalues and eigenvectors as the spectral features, and the period is set to 10. In the fine-tuning stage, we remove the self-supervised learning objective, and an additional linear projection layer is used on the output of the encoder for classification. The hyperparameters are the same as in the pre-training stage. The detailed statistics of the datasets are shown in Table 4.

Table 4: Statistics of transfer learning datasets.

|         | Graphs       | Utilization | Avg. Nodes | Avg. Edges |
|---------|--------------|-------------|------------|------------|
| ZINC-2M | Pre-Training | 2,000,000   | 26.62      | 57.72      |
| BBBP    | Finetuning   | 2,039       | 24.06      | 51.90      |
| Tox21   | Finetuning   | 7,831       | 18.57      | 38.58      |
| SIDER   | Finetuning   | 1,427       | 33.64      | 70.71      |
| ClinTox | Finetuning   | 1,477       | 26.15      | 55.76      |
| BACE    | Finetuning   | 1,513       | 34.08      | 73.71      |
| HIV     | Finetuning   | 41,127      | 25.51      | 54.93      |
| MUV     | Finetuning   | 93,087      | 24.23      | 52.55      |
| ToxCast | Finetuning   | 8,576       | 18.78      | 38.52      |

## 519 B.5 Stability Experiment

520 We use the PyTorch-style pseudo code to explain how we generate the synthetic perturbations (Figure  
521 2) and practical perturbations (Figure 3).

```
e, u = torch.linalg.eigh(L) # EVD

random_sign = 2*torch.randint(0, 2, (N,))- 1
sign_flip = torch.diag(random_sign).float()
coor_flip = torch.randperm(N)

u_sign = torch.mm(u, sign_flip)
u_basis = u.clone()[:, coor_flip]
```

Figure 2: Synthetic perturbations

```
e3, u3 = scipy.sparse.linalg.eigsh(
    L, k=100, which='SM', tol=1e-3)

e4, u4 = scipy.sparse.linalg.eigsh(
    L, k=100, which='SM', tol=1e-4)

e5, u5 = scipy.sparse.linalg.eigsh(
    L, k=100, which='SM', tol=1e-5)
```

Figure 3: Practical perturbations

## 522 C Matrix Form of EigenMLP

523 We give a detailed matrix form of Equation 6, from which we can see that the Fourier features of  
524 eigenvalues give different weights to the eigenvectors, thus making the model invariant to the rotation  
525 of coordinates and preserving good fitting ability.

$$\begin{aligned}
 & \underbrace{\begin{bmatrix} u_1^1 & u_2^1 & \cdots & u_k^1 \\ u_1^2 & u_2^2 & \cdots & u_k^2 \\ \vdots & \vdots & \ddots & \vdots \\ u_1^N & u_2^N & \cdots & u_k^N \end{bmatrix}}_{\text{Eigenvectors, } N \times k} \times \underbrace{\begin{bmatrix} \cos(\lambda_1) & \sin(\lambda_1) & \cdots & \cos(T\lambda_1) & \sin(T\lambda_1) \\ \cos(\lambda_2) & \sin(\lambda_2) & \cdots & \cos(T\lambda_2) & \sin(T\lambda_2) \\ \vdots & \vdots & \ddots & \vdots & \vdots \\ \cos(\lambda_k) & \sin(\lambda_k) & \cdots & \cos(T\lambda_k) & \sin(T\lambda_k) \end{bmatrix}}_{\text{Fourier features of eigenvalues, } k \times 2T} \\
 & \times \underbrace{\begin{bmatrix} \alpha_1^1 & \alpha_2^1 & \cdots & \alpha_d^1 \\ \alpha_1^2 & \alpha_2^2 & \cdots & \alpha_d^2 \\ \vdots & \vdots & \ddots & \vdots \\ \alpha_1^{2T} & \alpha_2^{2T} & \cdots & \alpha_d^{2T} \end{bmatrix}}_{\text{Parameters of learnable matrix, } 2t \times d} = \underbrace{\begin{bmatrix} h_1^1 & h_2^1 & \cdots & h_d^1 \\ h_1^2 & h_2^2 & \cdots & h_d^2 \\ \vdots & \vdots & \ddots & \vdots \\ h_1^N & h_2^N & \cdots & h_d^N \end{bmatrix}}_{\text{Representations, } N \times d} \quad (7)
 \end{aligned}$$

## 526 D Pseudo Algorithm

527 In order to better demonstrate our algorithm, here we provide the pseudo algorithms of EigenMLP  
528 (Figure 4) and Sp<sup>2</sup>GCL (Figure 5).

Figure 4: Pseudo Algorithm of EigenMLP

---

```

class EigenMLP(nn.Module)

    def __init__(self, k, d, T):
        # k: number of Eigenvectors
        # d: hidden dimension
        # T: period
        self.phi = nn.Sequential(nn.Linear(1, d), nn.ReLU(), nn.Linear(d, d))
        self.psi = nn.Sequential(nn.Linear(d, d), nn.ReLU(), nn.Linear(d, 1))
        self.mlp = nn.Sequential(nn.Linear(2*T, d), nn.ReLU(), nn.Linear(d, d))

    def forward(e, u):
        u = u.unsqueeze(-1)
        u = self.psi(self.phi(u) + self.phi(-u)).squeeze(-1)      # [N, k]

        T_term = torch.arange(0, T).float()
        T_e = e.unsqueeze(1) * T
        F_e = torch.cat([torch.sin(T_e), torch.cos(T_e)], dim=-1)  # [k, 2T]

        return self.mlp(torch.mm(u, F_e))

```

---

Figure 5: Pseudo Algorithm of Sp<sup>2</sup>GCL

---

```

def Sp2GCL(g, x, e, u):
    # g: graph structures
    # x: node features
    # e: eigenvalues
    # u: eigenvectors
    x_a = GNN(g, x)
    x_e = EigenMLP(e, u)

    # For graph-level tasks
    # x_a = add_pool(g, x_a)
    # x_e = add_pool(g, x_e)

    h_a = spa_projection_head(x_a)
    h_e = spe_projection_head(x_e)

    h_a = F.normalize(h_a, dim=-1, p=2)
    h_e = F.normalize(h_e, dim=-1, p=2)

    logits = torch.mm(h_a, h_e.t())
    labels = torch.arange(h_a.size(0), dtype=torch.long)

    return 0.5 * F.cross_entropy(logits, labels) +
           0.5 * F.cross_entropy(logits.t(), labels)

```

---
